# Supplementary material
Source: PubMed Central journal article supplement (PMC4931187)

Fig. 1A

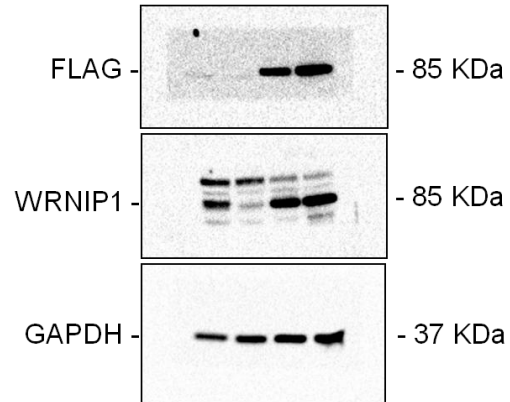

Supplement: EMBJ-35-1437-s003.pdf [file EMBJ-35-1437-s003.pdf]

Fig.3B

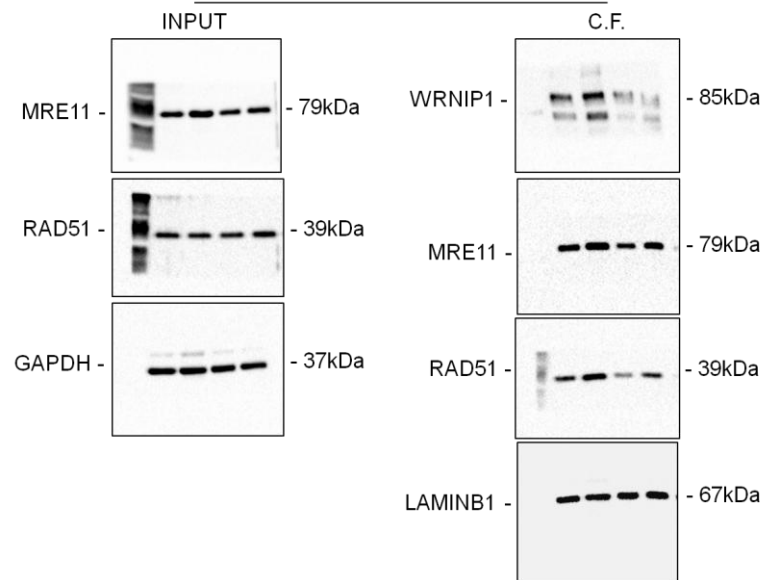

Fig. 3D

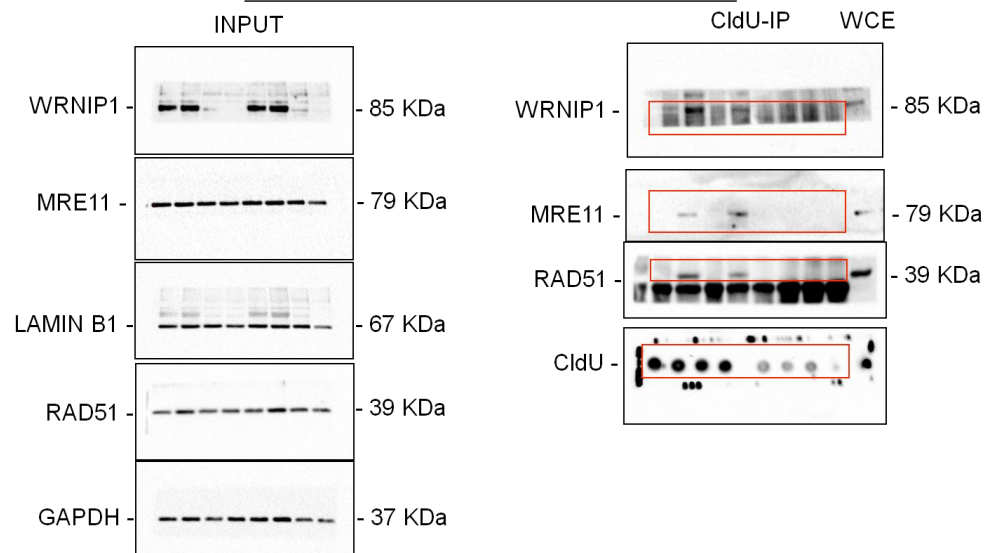

Supplement: EMBJ-35-1437-s004.pdf [file EMBJ-35-1437-s004.pdf]

Fig. 4D

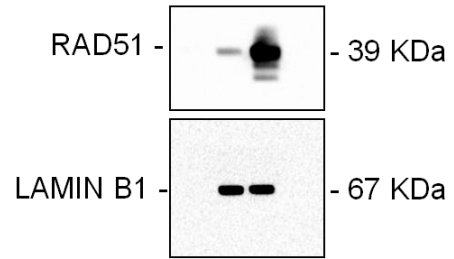

Supplement: EMBJ-35-1437-s005.pdf [file EMBJ-35-1437-s005.pdf]

Fig. 5A

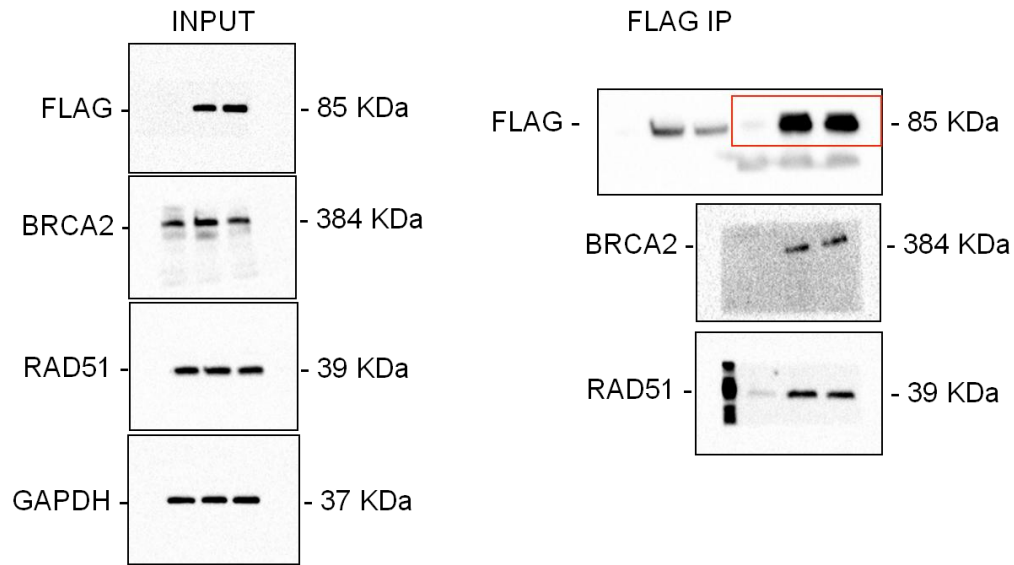

Fig. 5D

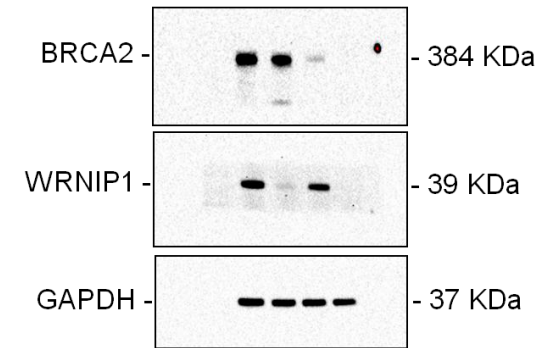

Fig. 5E

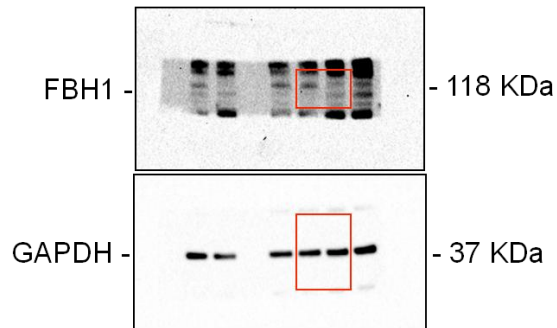

Fig.5G

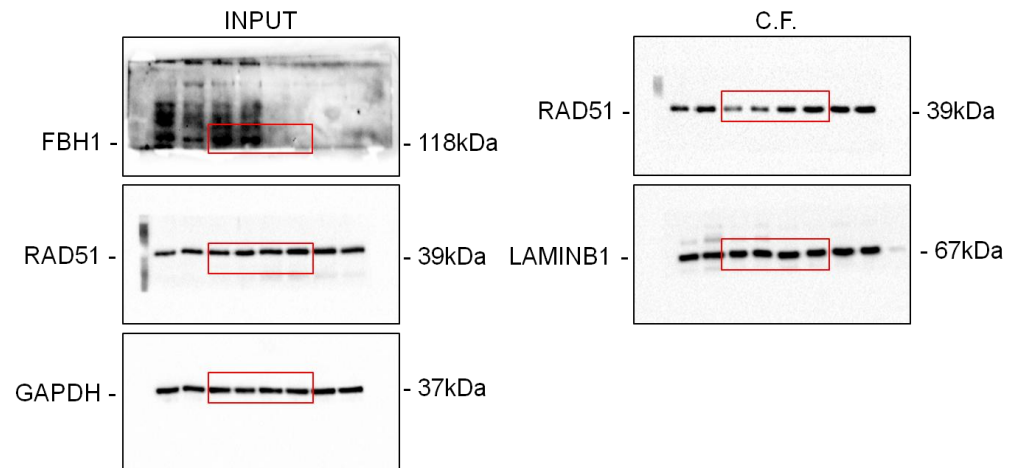

Supplement: EMBJ-35-1437-s006.pdf [file EMBJ-35-1437-s006.pdf]

Fig. 6F

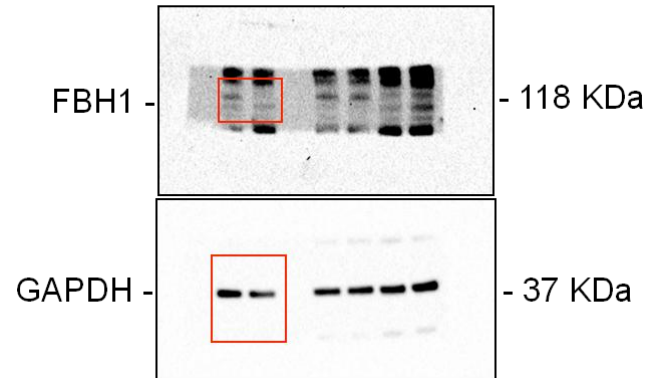

Supplement: EMBJ-35-1437-s007.pdf [file EMBJ-35-1437-s007.pdf]
